# Supplementary material
Source: Springer Nature journal article supplement (https://www.springermedizin.de/resource/supplementary/12245_2011_123_MOESM3_ESM.pdf/9672760)
Supplement: MOESM3 [file 9672760]

5992 patients with at least one predisposing condition at the time of ED evaluation or hospital admission for elective high-risk surgery

Exclusions: 166 ALI on admission, 124 in-patient transfers, 44 readmissions, 28 comfort care, 46 other (died in the ED, prisoner, incomplete record)

5584 enrolled

Hospital admission for elective surgery

4361 ED subgroup

303 ALI

4058 No ALI
